# Supplementary material for: Cardiomyocyte-Specific Circulating Cell-Free Methylated DNA in Esophageal Cancer Patients Treated with Chemoradiation
Source: MDPI journal article supplement (doi:10.3390/gidisord3030011), 2021-07-30
Supplement: s1 [file s1]

# Supplementary Materials

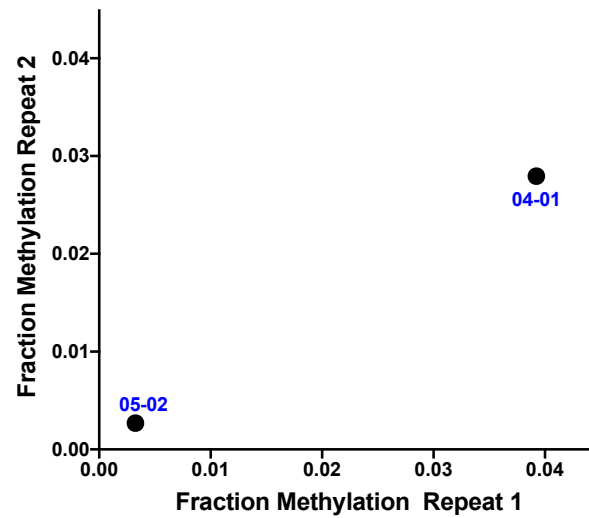

**Figure S1.** Repeat measurements of cardiomyocyte-specific methylated cfDNA in patient serum. Independent repeat measurements (from isolation to sequencing) of samples from patients RT05-02 and RT04-01 (blue). Data are from separate serum DNA extractions and sequencing analysis.  $n = 2$  per data point.

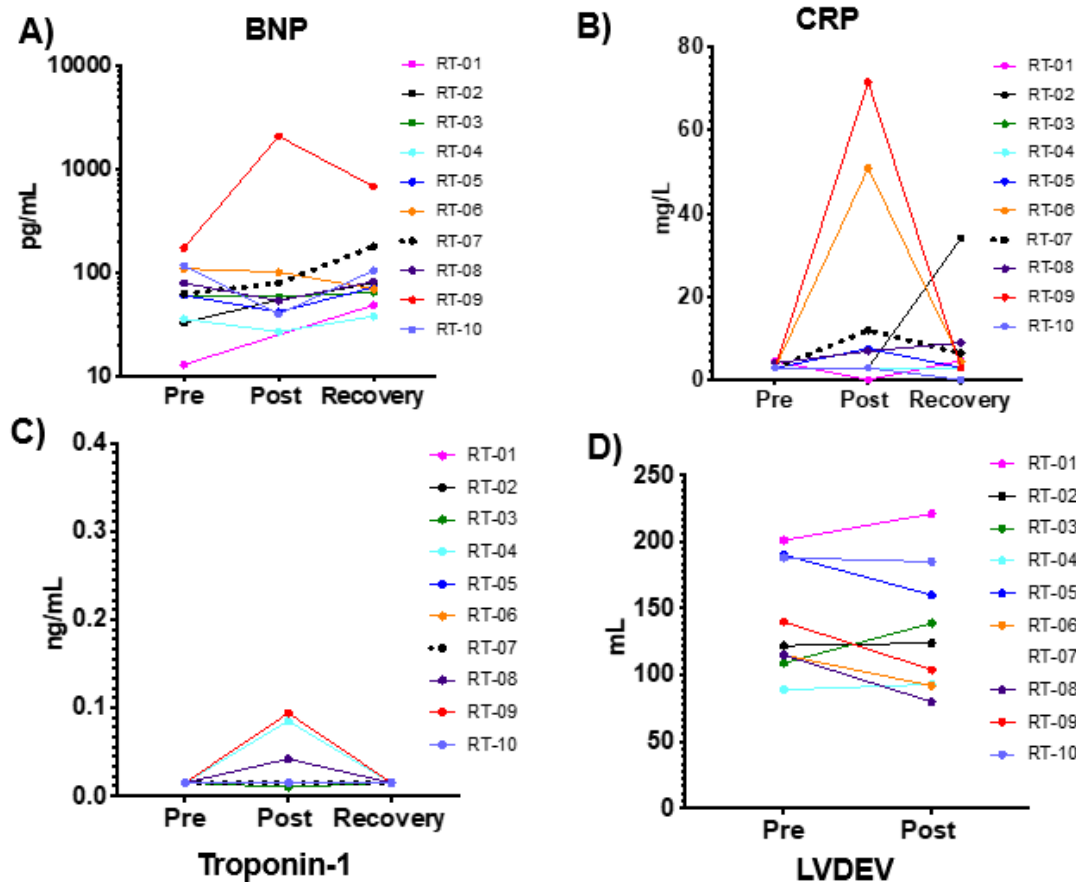

**Figure S2.** Serum and cardiac function markers (A) Clinical parameters patients BNP values, for 3 time points before after and at recovery, normal BNP values are less than 100 pg/mL shown in grey (B) Clinical parameters patients CRP values, for 3 time points before after and at recovery, normal

CRP values are less than 3 mg/L shown in grey (C) Clinical parameters patients troponin-I values, for 3 time points before after and at recovery, normal range 0–0.4ng/mL shown in grey (D) Cardiac function LVDEV values pre and post recovery. Not shown in the figure attached to the email.
